# Supplementary material
Source: PubMed Central journal article supplement (PMC3738238)
Supplement: jn.112.168245_nutrition168245SupplementaryData1.pdf [file jn.112.168245_nutrition168245SupplementaryData1.pdf]

**Supplemental Table 1:** Nutrient composition of daily LNS given to all infants from 24-48 wk and LNS given to mothers from 0-28 wk as per randomized assignment <sup>1</sup>

| <b>Nutrient</b>                 | <b>Infant<br/>LNS<br/>(100 g/d)</b> | <b>Maternal<br/>LNS<br/>(140 g/d)</b> |
|---------------------------------|-------------------------------------|---------------------------------------|
| Energy, <i>kJ</i>               | 2300                                | 3120                                  |
| Protein, <i>g</i>               | 15                                  | 20.8                                  |
| Iron, <i>mg</i>                 | 11.5                                | 15                                    |
| Zinc, <i>mg</i>                 | 14                                  | 19                                    |
| Phosphorus, <i>mg</i>           | 394                                 | 1.2                                   |
| Selenium, $\mu$ <i>g</i>        | 30                                  | 75                                    |
| Thiamin, <i>mg</i>              | 0.6                                 | 1.6                                   |
| Riboflavin, <i>mg</i>           | 1.8                                 | 1.8                                   |
| Niacin, <i>mg</i>               | 5.3                                 | 20                                    |
| Pyridoxine, <i>mg</i>           | 0.6                                 | 2.2                                   |
| Cyanocobalamin, $\mu$ <i>g</i>  | 1.8                                 | 2.6                                   |
| Ascorbic acid, <i>mg</i>        | 53                                  | 100                                   |
| $\alpha$ -tocopherol, <i>mg</i> | 20                                  | 12                                    |
| Folic acid, $\mu$ <i>g</i>      | 210                                 | 300                                   |
| Iodine, $\mu$ <i>g</i>          | 110                                 | 200                                   |
| Vitamin A, $\mu$ <i>g</i>       | 910                                 | -                                     |
| Vitamin D, $\mu$ <i>g</i>       | 16                                  | -                                     |
| Vitamin K, $\mu$ <i>g</i>       | 21                                  | -                                     |
| Biotin, $\mu$ <i>g</i>          | 65                                  | -                                     |
| Pantothenic acid, <i>mg</i>     | 3.1                                 | -                                     |
| Potassium, <i>g</i>             | 1.1                                 | 1.1                                   |
| Magnesium, <i>mg</i>            | 92                                  | 124                                   |
| Copper, <i>mg</i>               | 1.78                                | 0.3                                   |
| Calcium, <i>mg</i>              | 320                                 | 294                                   |

<sup>1</sup>Infant LNS contained groundnuts, dried full cream milk, vegetable oil, sugar and vitamin-mineral premix and maternal LNS contained ground peanuts, dried skimmed milk, vegetable fat, sugar, and multivitamin-mineral premix.
