# Supplementary material
Source: PubMed Central journal article supplement (PMC3738238)

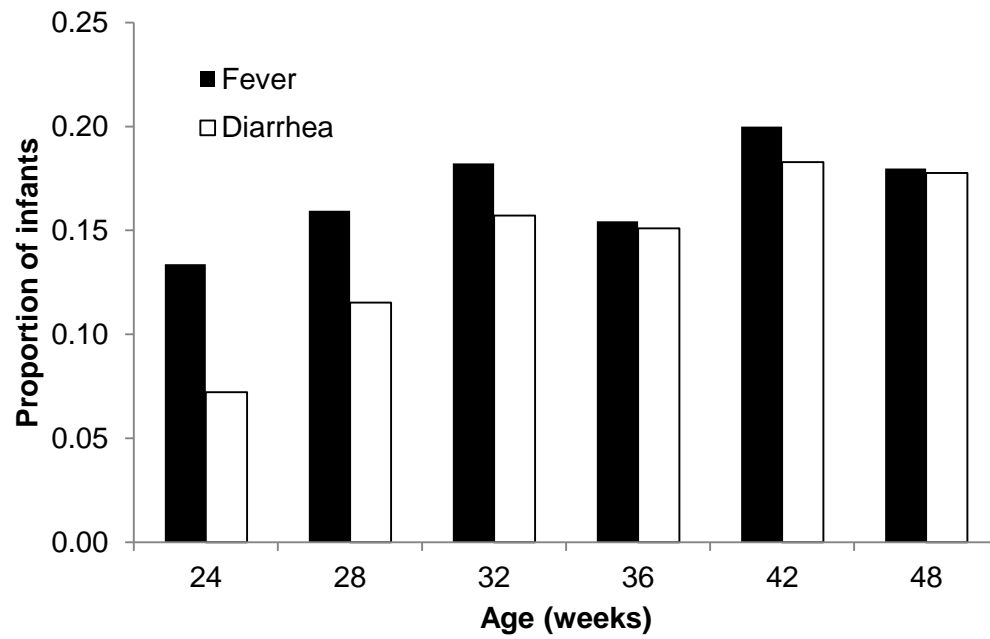

**Supplemental Figure 1:** Proportion of BAN infants with current or reported fever or diarrhea

Supplement: jn.112.168245_nutrition168245SupplementaryData2.pdf [file jn.112.168245_nutrition168245SupplementaryData2.pdf]
